# Supplementary material
Source: Springer Nature journal article supplement (https://www.springermedizin.de/resource/supplementary/12936_2014_3326_MOESM5_ESM.pdf/9545666)

head end  
(vertical)

top of net  
(horizontal)

foot end  
(vertical)

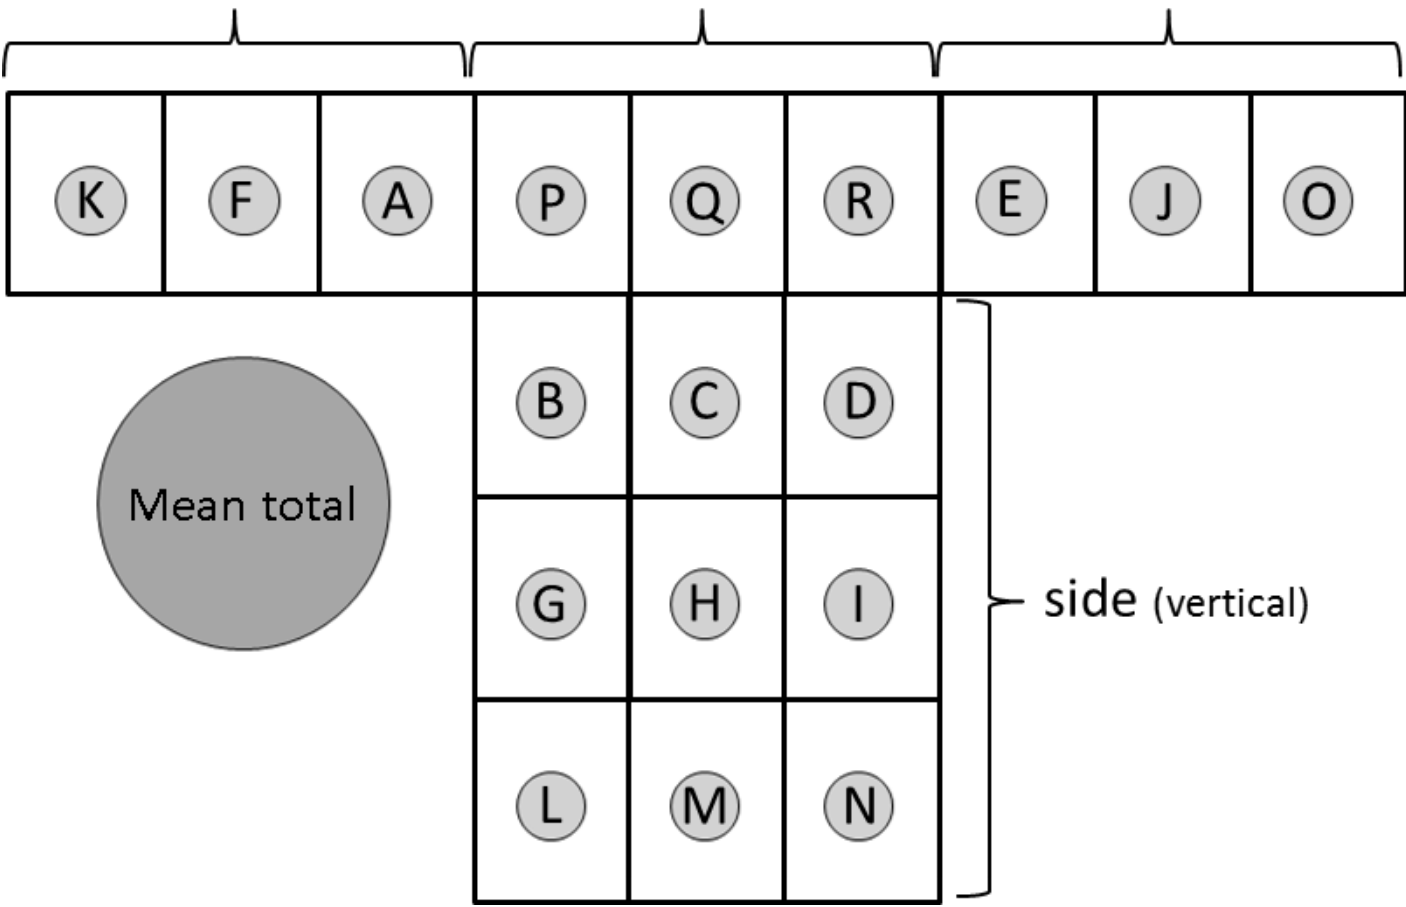

Mean total

side (vertical)

Supplement: MOESM5 [file 9545666]
